# Supplementary material for: Relationship between high dietary fat intake and Parkinson’s disease risk: a meta-analysis
Source: PubMed Central journal article supplement — Neural Regen Res. 2019 Aug 7;14(12):2156–63. doi: 10.4103/1673-5374.262599 (PMC6788237; doi:10.4103/1673-5374.262599), 2019-08-07
Supplement: NRR-14-2156_Suppl1.pdf [file NRR-14-2156_Suppl1.pdf]

## OPEN PEER REVIEW REPORT 1

**Reviewer:** Anupom Borah, Assam University, India.

**Comments to the authors:**

Incorporating these comments will help to improve manuscript quality

1. Please justify your sentence mentioned in the 6th line as "PD is not a single disease but is instead a number of phenotypically similar illnesses".
2. The sentence regarding risk factor for PD is repeated two times in the introduction.
3. In results it will be helpful for readers if relative risk factor limit is mentioned, above which risk for PD is associated.
